# Supplementary material for: Separation and Identification of Resveratrol Butyrate Ester Complexes and Their Bioactivity in HepG2 Cell Models
Source: MDPI journal article supplement (doi:10.3390/ijms222413539), 2021-12-17
Supplement: s1 [file s1]

Supplementary Materials:

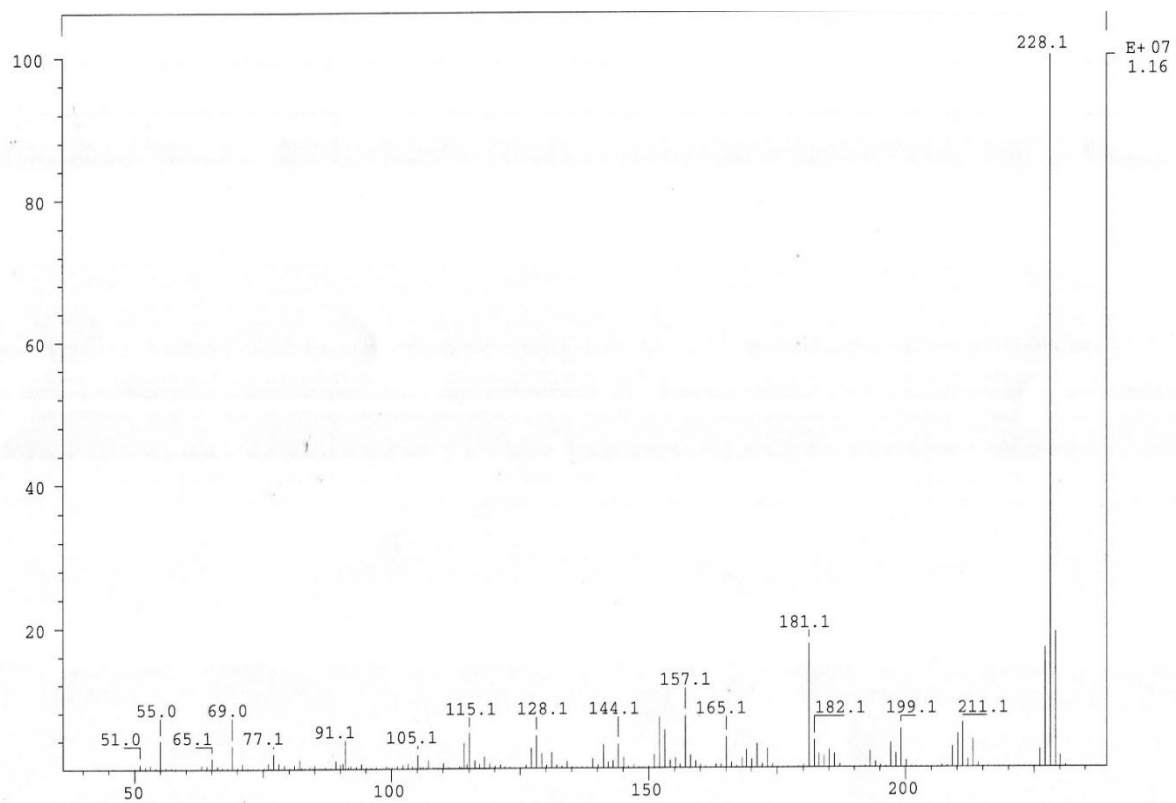

**Figure S1:** Mass Spectrum of compound **1** (EI-MS Spectrum)

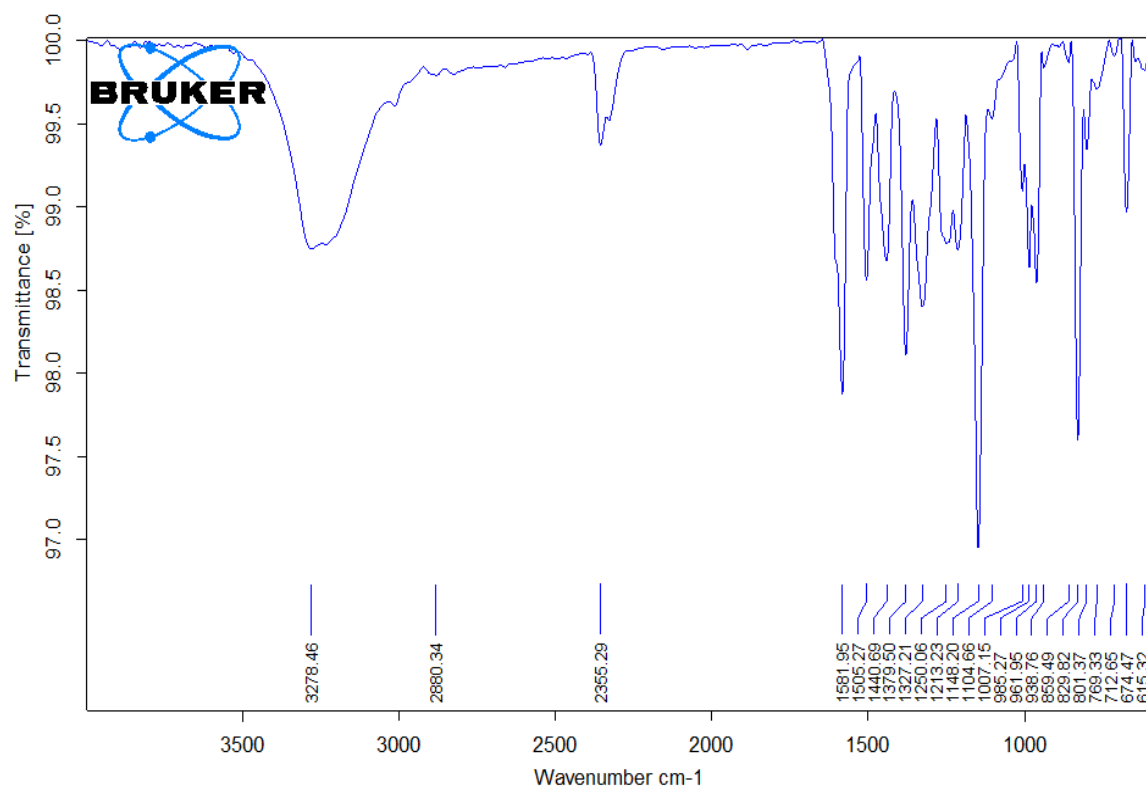

**Figure S2:** IR spectrum of compound **1**

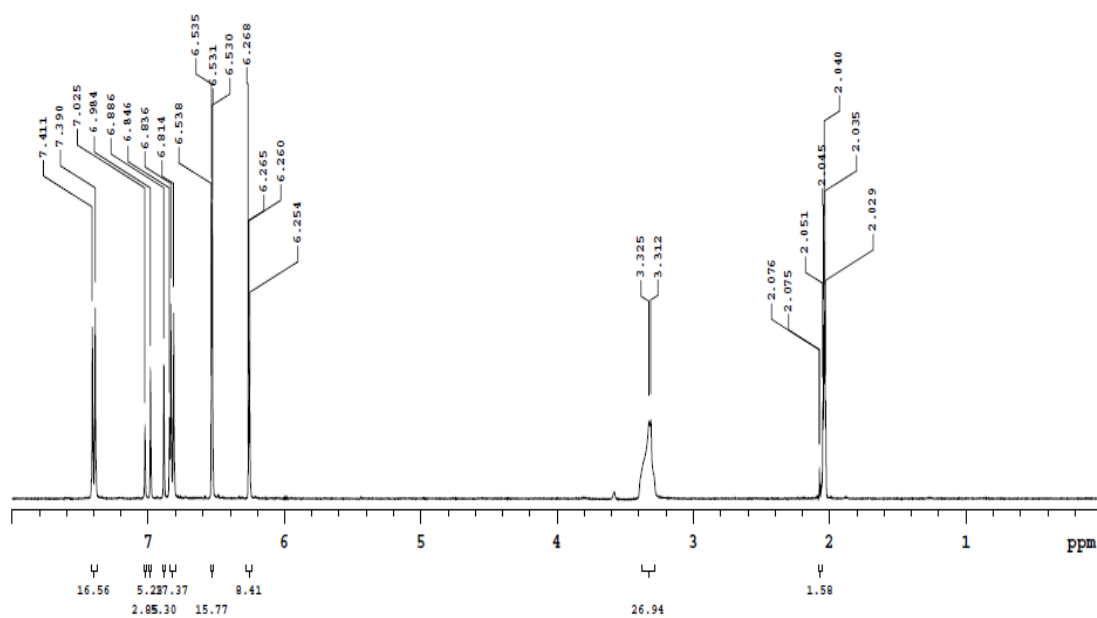

Data file exp

Plot date 2020-11-05

**Figure S3:** <sup>1</sup>H-NMR spectrum of compound **1** in CD<sub>3</sub>COCD<sub>3</sub>

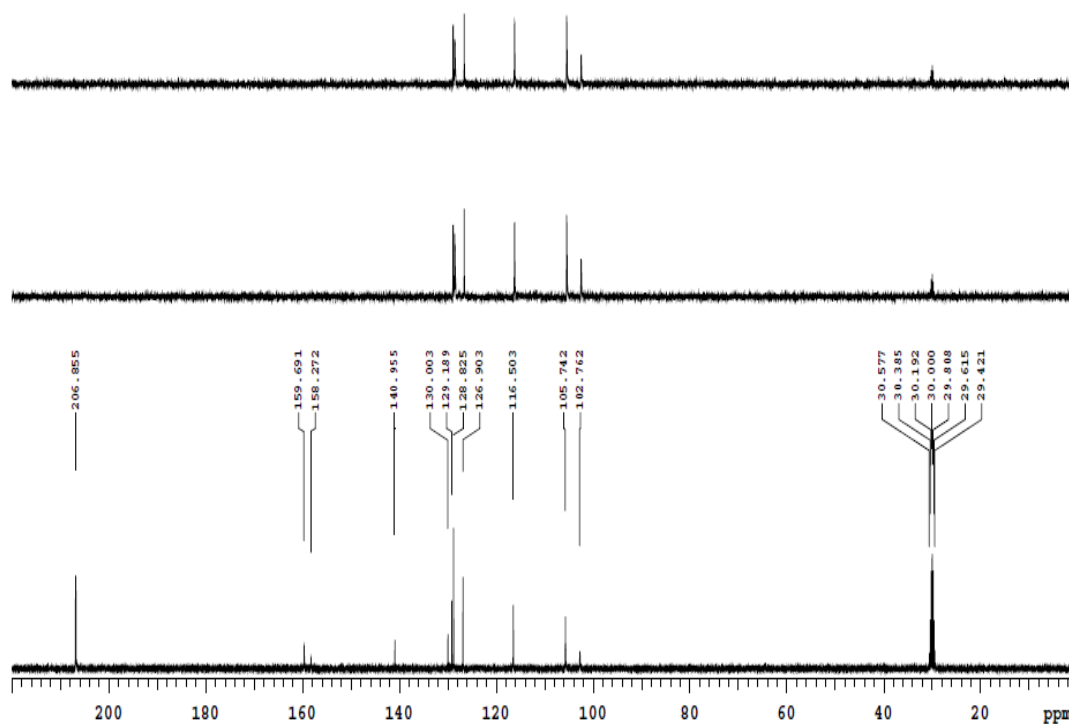

**Figure S4:**  $^{13}\text{C}$ -NMR spectrum and DEPT of compound **1** in  $\text{CD}_3\text{COCD}_3$

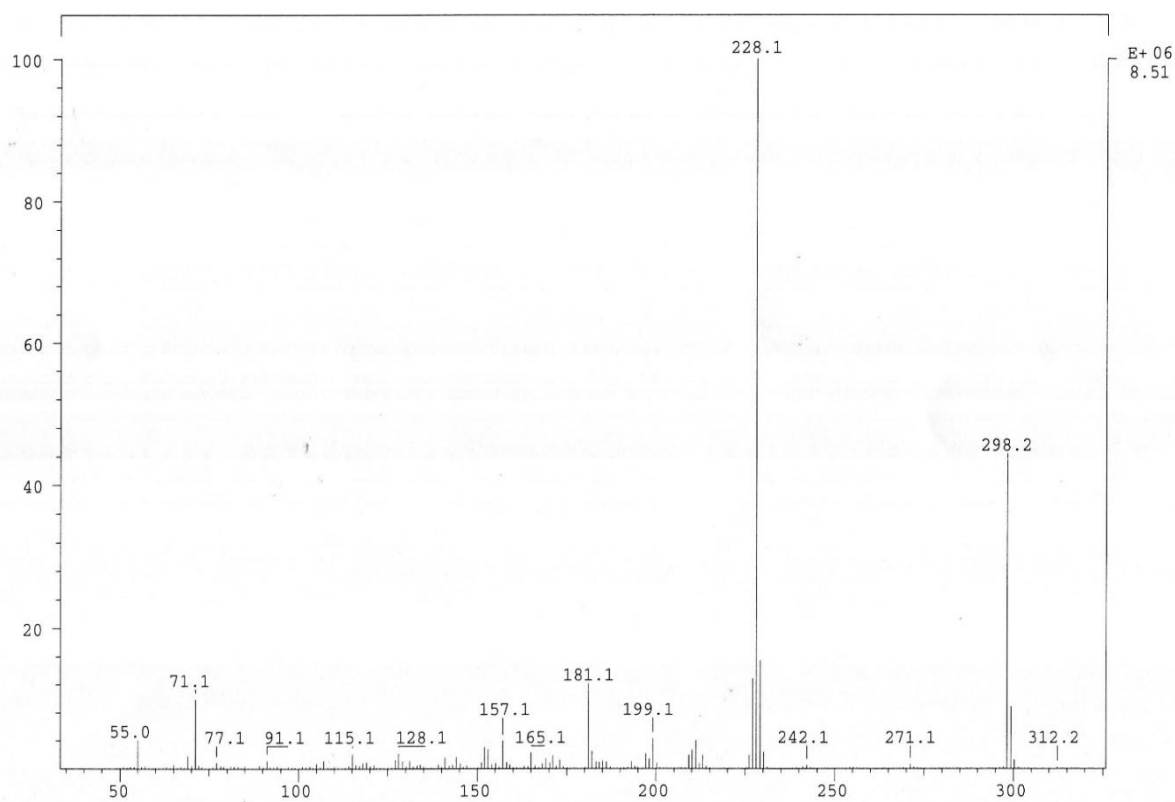

**Figure S5:** Mass Spectrum of compound **2** (EI-MS Spectrum)

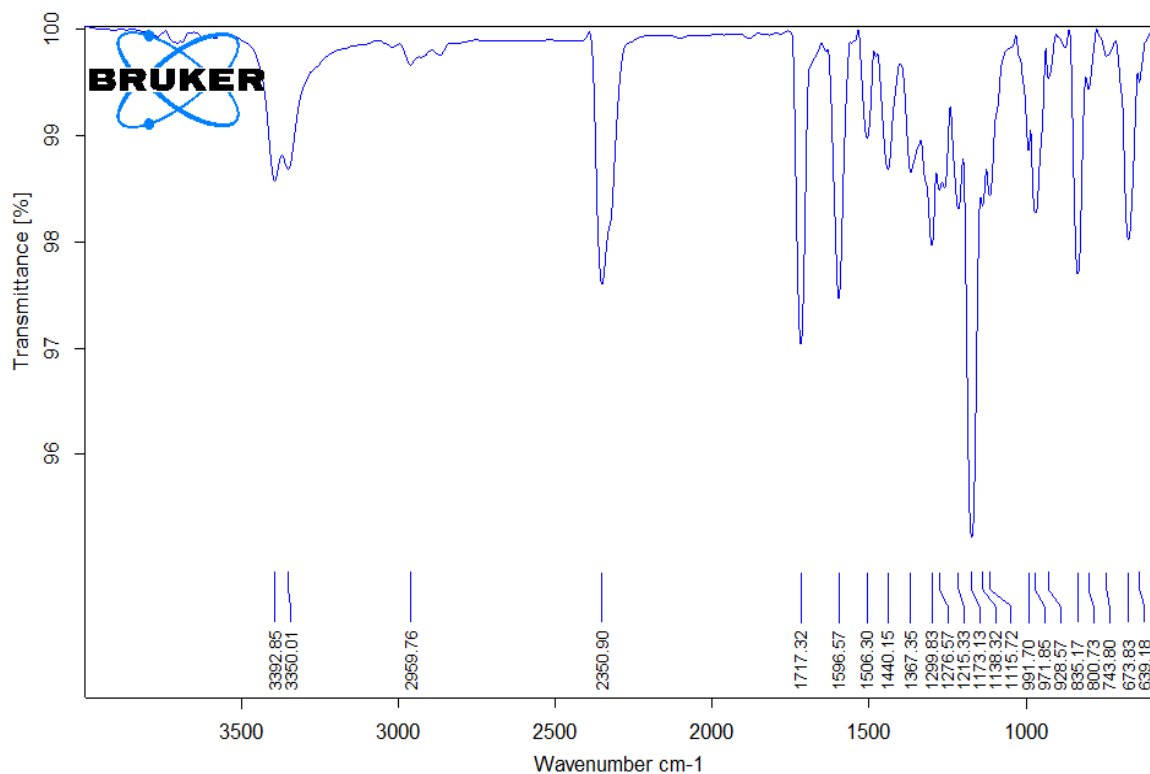

**Figure S6:** IR spectrum of compound **2**

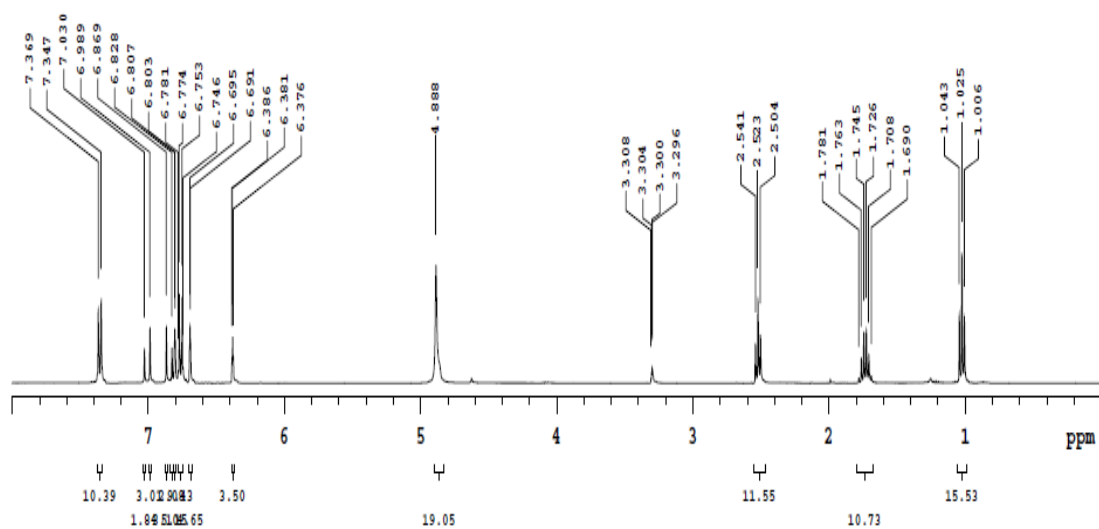

Data file: /home/vnmr2/vnmr/sydata/ED/201105-ED4h.fid

Plot date: 2020-11-18

**Figure S7:** <sup>1</sup>H-NMR spectrum of compound **2** in CD<sub>3</sub>OD

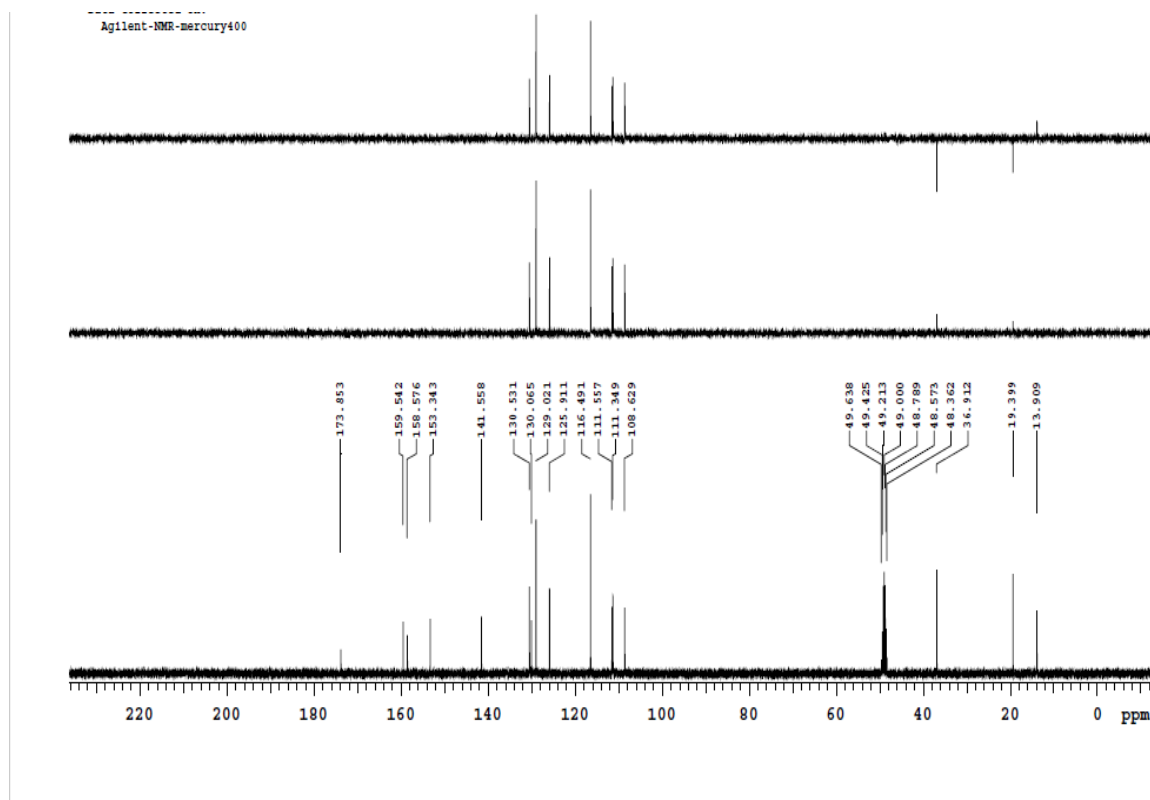

**Figure S8:**  $^{13}\text{C}$ -NMR spectrum and DEPT of compound **2** in  $\text{CD}_3\text{OD}$

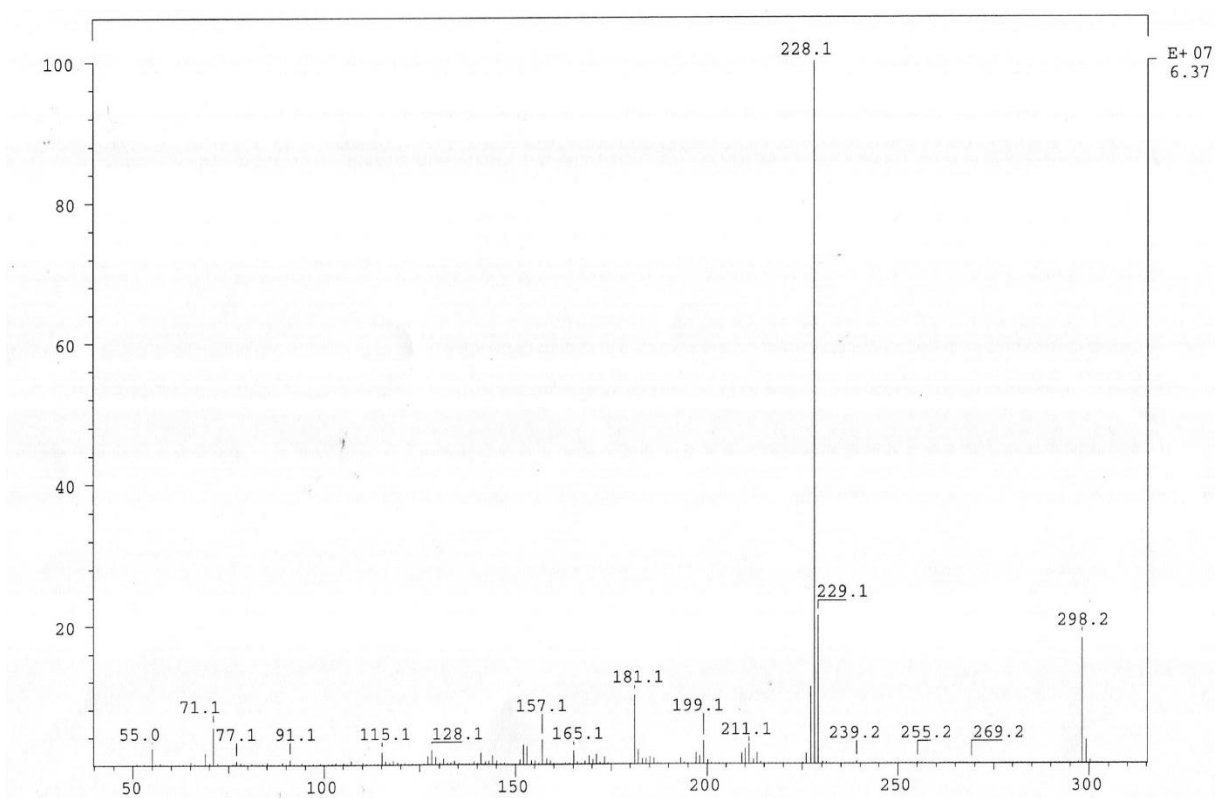

**Figure S9:** Mass Spectrum of compound **3** (EI-MS Spectrum)

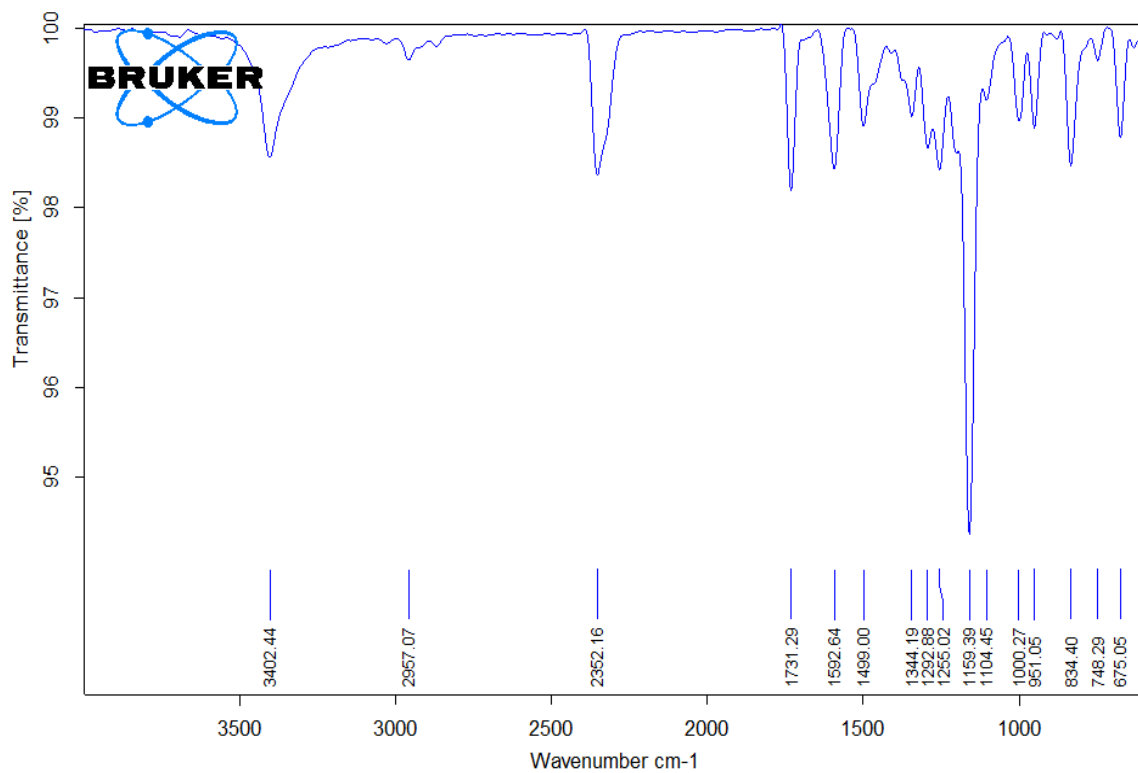

Figure S10: IR spectrum of compound **3**

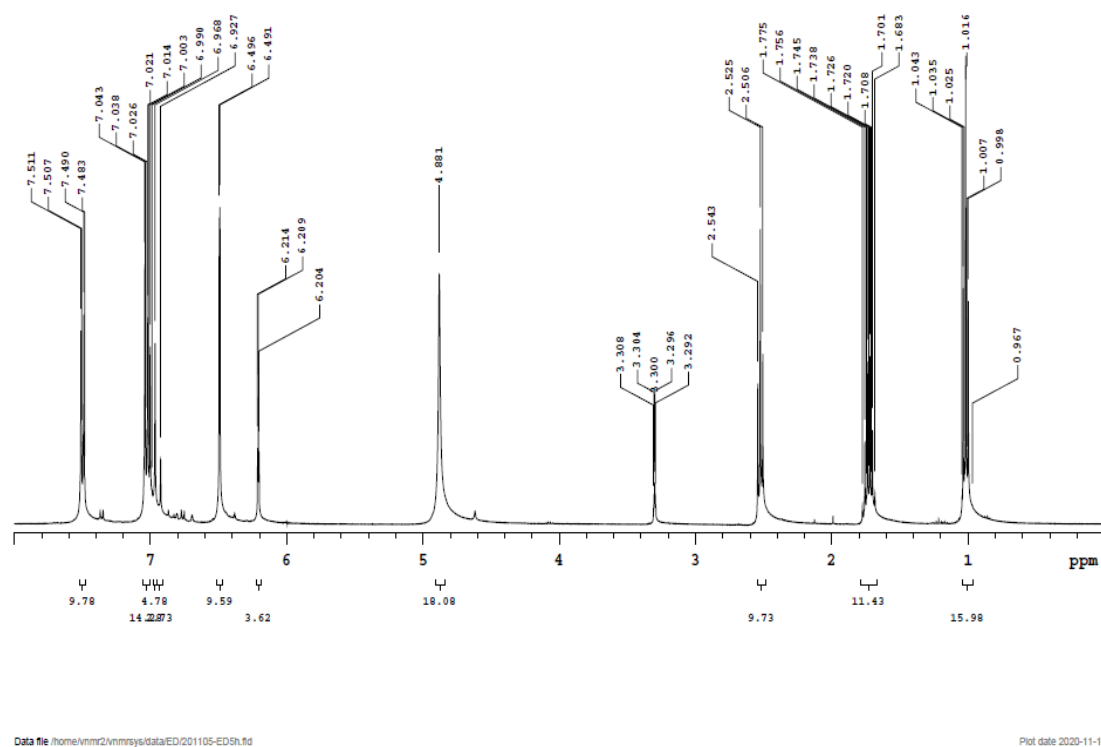

Figure S11: <sup>1</sup>H-NMR spectrum of compound **3** in CD<sub>3</sub>OD

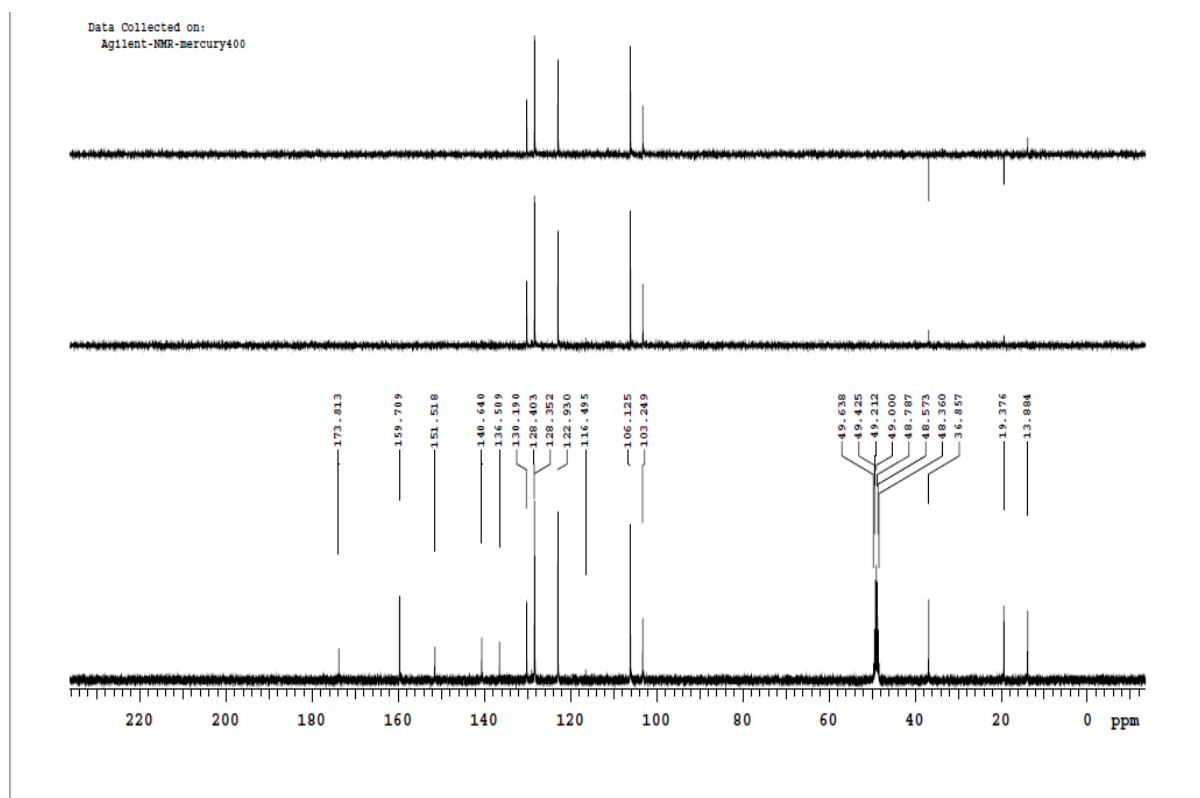

**Figure S12:**  $^{13}\text{C}$ -NMR spectrum and DEPT of compound **3** in  $\text{CD}_3\text{OD}$

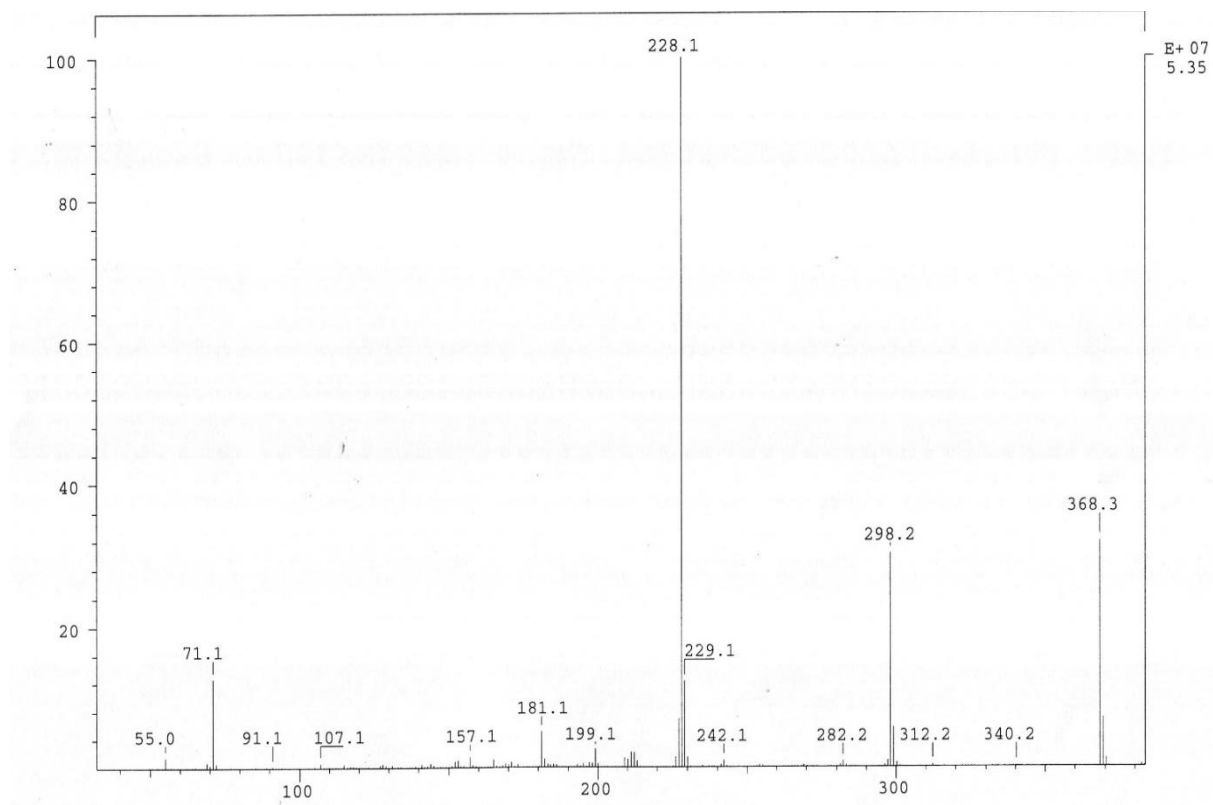

**Figure S13:** Mass Spectrum of compound **4** (EI-MS Spectrum)

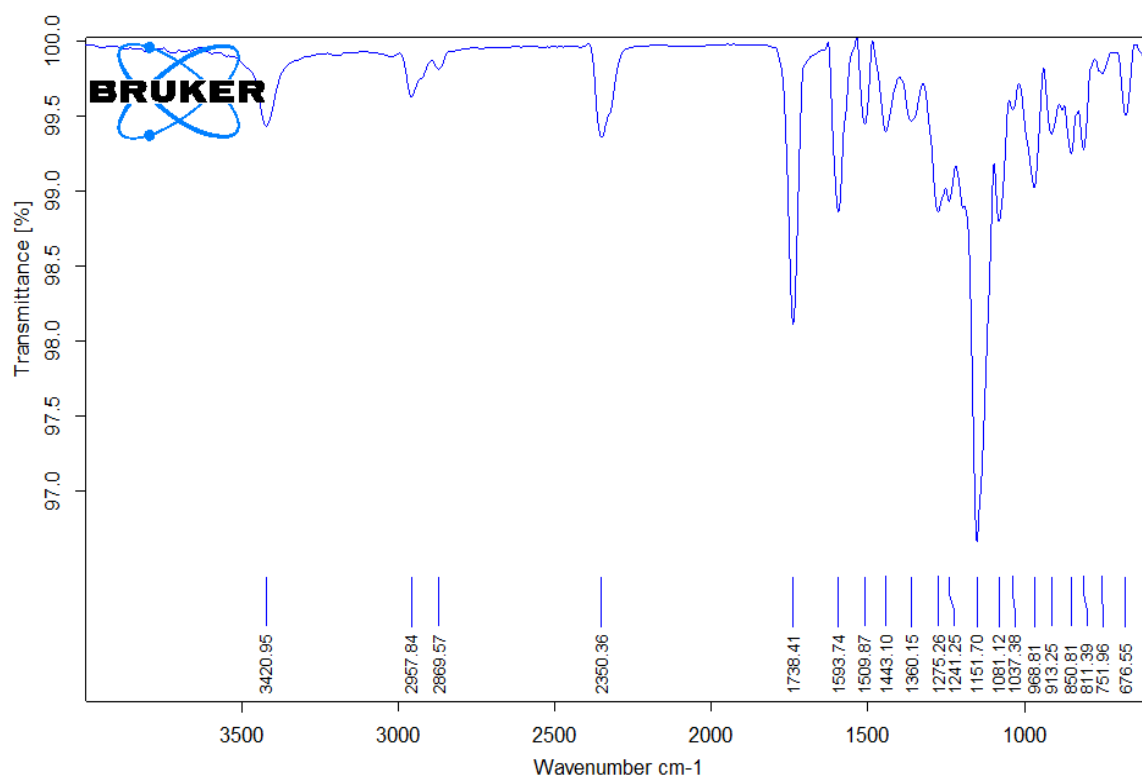

Figure S14: IR spectrum of compound 4

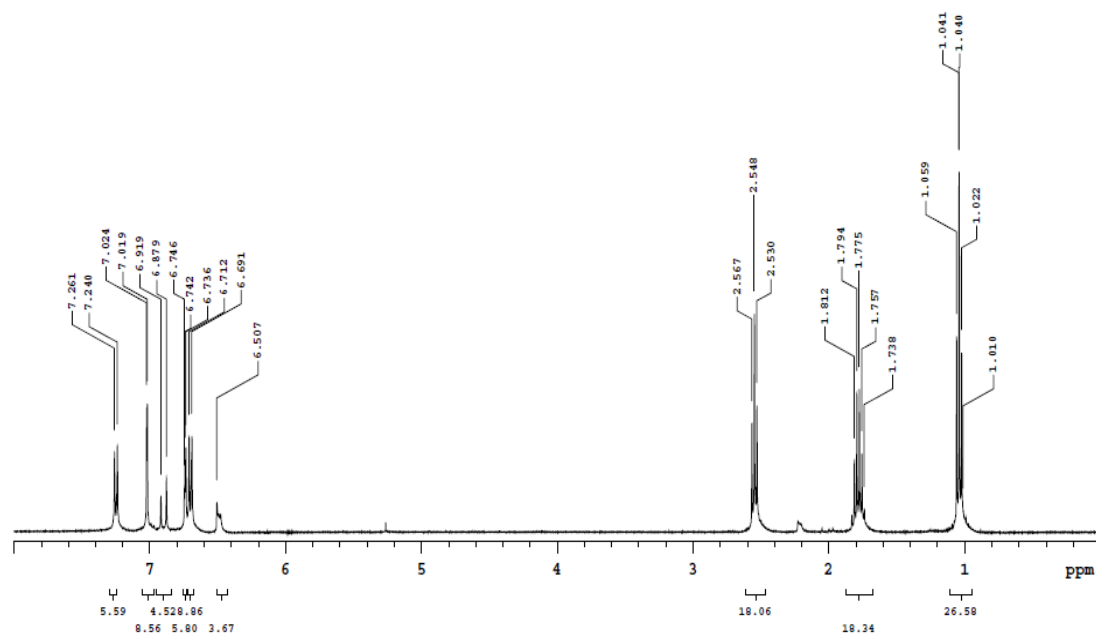

Data file: /home/vnmr2/vnmrsys\data/ED/201116-ED7h.fid

Plot date: 2020-11-16

Figure S15: <sup>1</sup>H-NMR spectrum of compound 4 in CDCl<sub>3</sub>



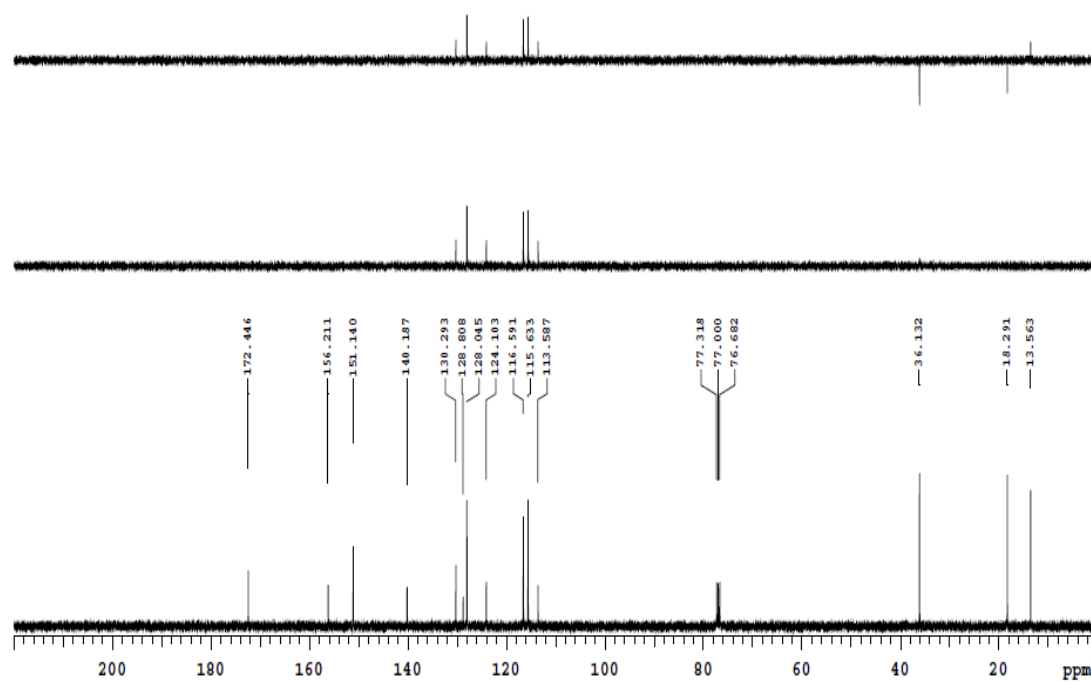

**Figure S16:** <sup>13</sup>C-NMR spectrum and DEPT of compound **4** in CDCl<sub>3</sub>

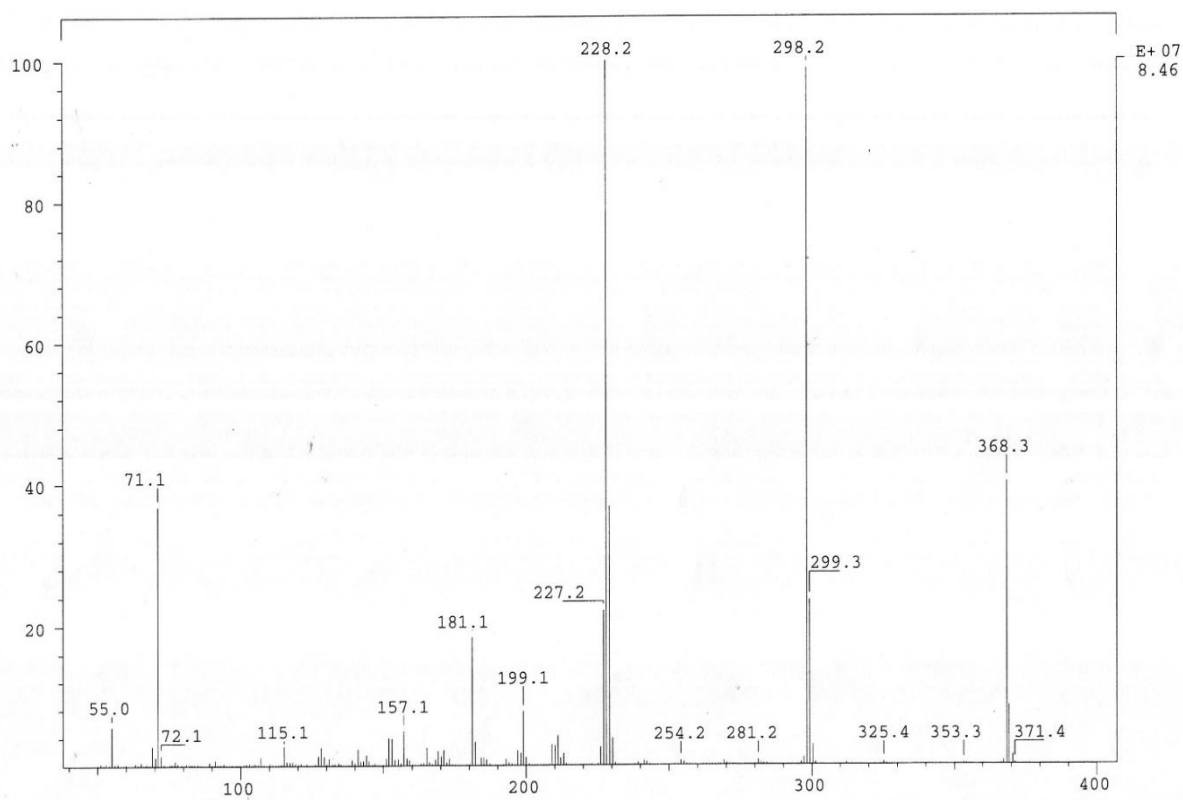

**Figure S17:** Mass Spectrum of compound **5** (EI-MS Spectrum)

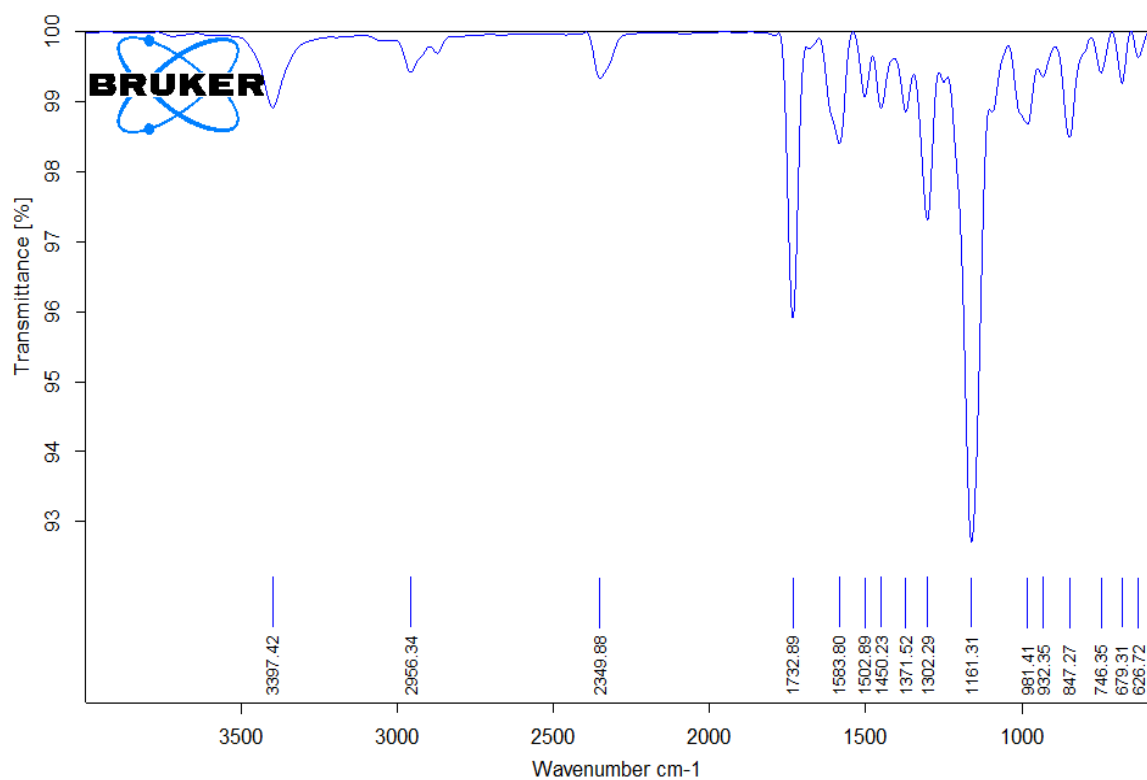

Figure S18: IR spectrum of compound **5**

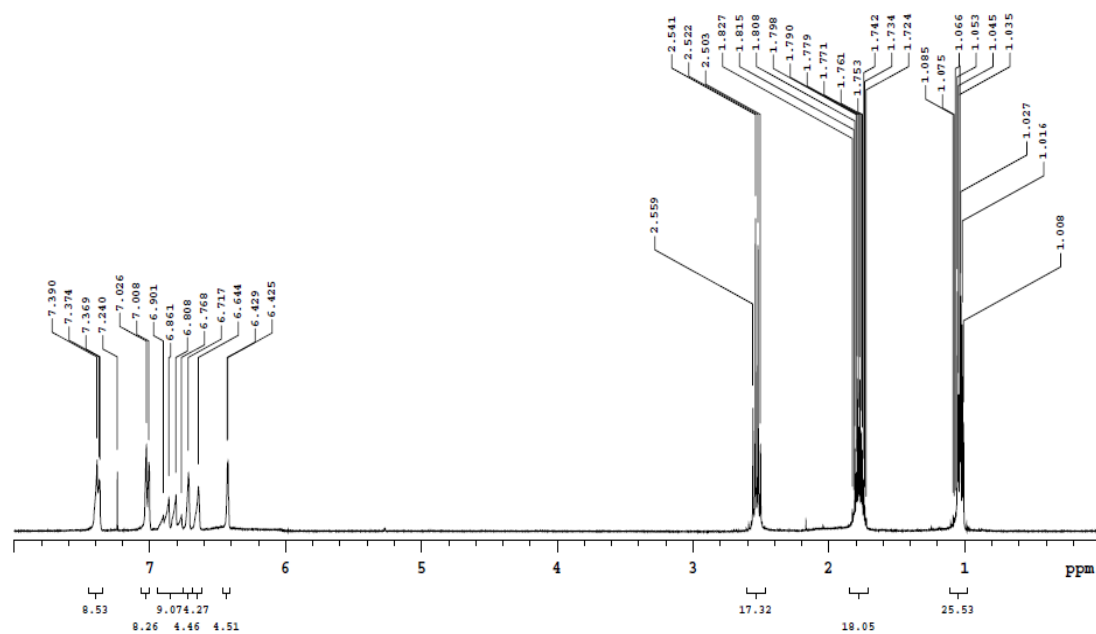

Figure S19:  $^1\text{H}$ -NMR spectrum of compound **5** in  $\text{CDCl}_3$

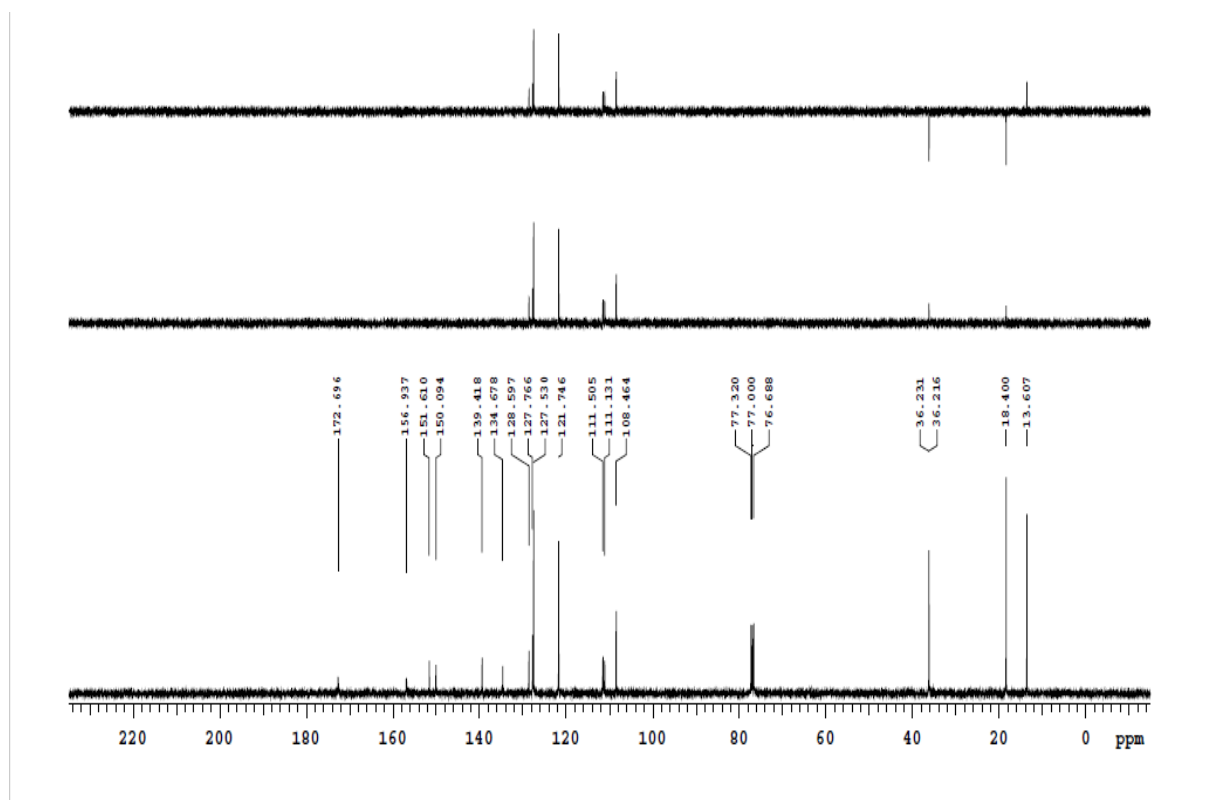

Figure S20:  $^{13}\text{C}$ -NMR spectrum and DEPT of compound **5** in  $\text{CDCl}_3$

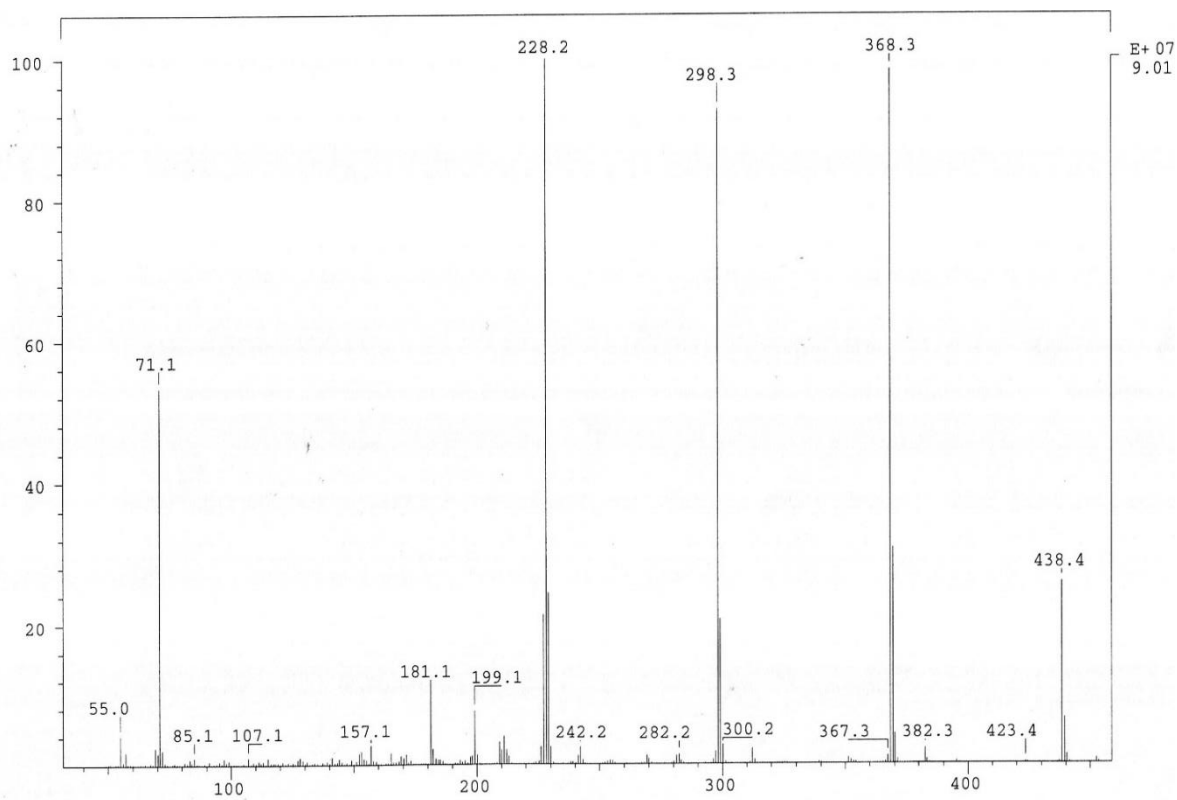

Figure S21: Mass Spectrum of compound **6** (EI-MS Spectrum)

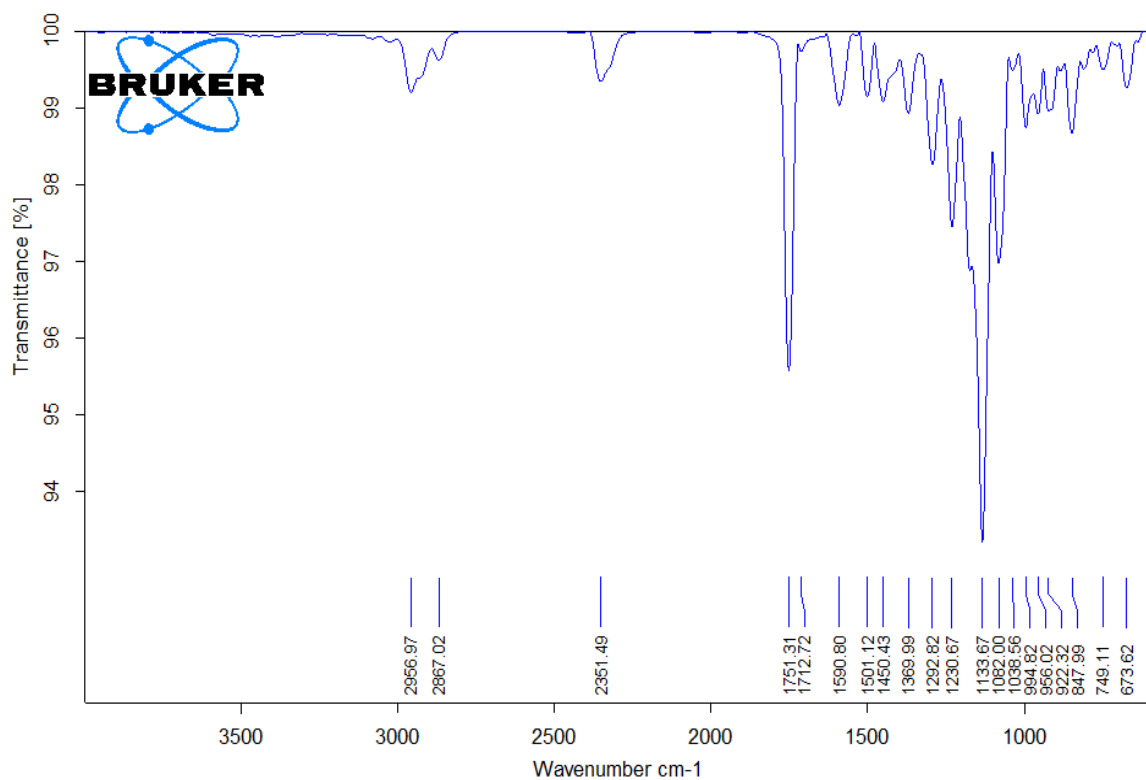

Figure S22: IR spectrum of compound 6

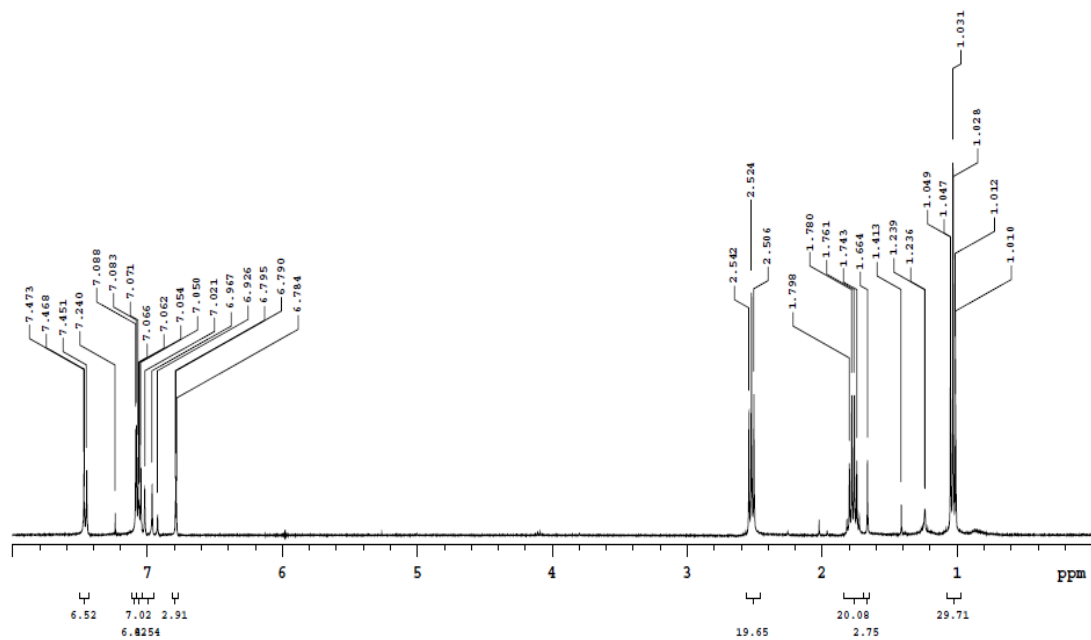

Data file: /home/vnmr2/vnmrsys/data/ED/201116-ED6h.fid

Plot date: 2020-11-16

Figure S23: <sup>1</sup>H-NMR spectrum of compound 6 in CDCl<sub>3</sub>

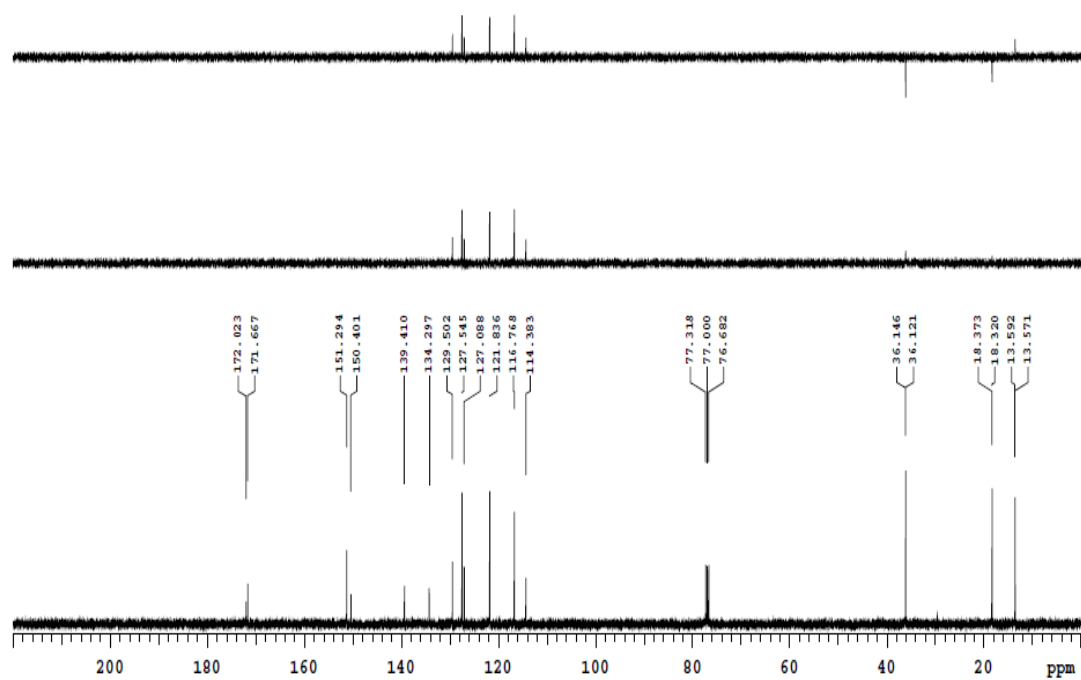

**Figure S24:**  $^{13}\text{C}$ -NMR spectrum and DEPT of compound **6** in  $\text{CDCl}_3$
